# Supplementary material
Source: PubMed Central journal article supplement (PMC4521036)

Characterization of wall teichoic acid degradation by the bacteriophage  $\phi$ 29 appendage protein GP12 using synthetic substrate analogs

**Cullen L. Myers<sup>1</sup>, Ronald G. Ireland<sup>1</sup>, Teresa A. Garrett<sup>2</sup> and Eric D. Brown<sup>1</sup>**

<sup>1</sup> Michael G. DeGroote Institute for Infectious Disease Research; Department of Biochemistry and Biomedical Sciences, McMaster University, Hamilton, Ontario, Canada L8N 3Z5

<sup>2</sup> Department of Chemistry, Vassar College, Poughkeepsie, New York, USA 1260

## **Supplementary Information**

**Table S1. Strains, plasmids and oligonucleotides used in this study**

| Strains                                 | Description                                                                                                                                                             | Source     |
|-----------------------------------------|-------------------------------------------------------------------------------------------------------------------------------------------------------------------------|------------|
| <i>E. coli</i> BL21-CodonPlus (DE3)-RIL | <i>E. coli</i> protein overexpression strain ( $F^- ompT hsdS$ ( $r_B m_b^-$ ) $dcm^+$ Tet <sup>r</sup> <i>gal endA Hte</i> [ <i>argU ileY leuW Cam</i> <sup>r</sup> ]) | Agilent    |
| <b>Plasmids</b>                         |                                                                                                                                                                         |            |
| pET28b-GP12                             | Expression plasmid for N-terminal hexahistidine-GP12                                                                                                                    | Ref. 27    |
| pΔN88GP12                               | Expression plasmid for N-terminal hexahistidine-ΔN88GP12                                                                                                                | This study |
| <b>Oligonucleotides</b>                 |                                                                                                                                                                         |            |
| ΔN88GP12-Forward                        | CTAGTAGCCATGGGCCACCATCATCATCATCATGATGAAAACC<br>TGTATTTTCAGGGCGACCTCGTTATCCAAGTTATC                                                                                      |            |
| GP12-Reverse                            | CTAGTAGTTAGTTCAAGAATAGTTGTTTTGGAGACGATTGAGA<br>CCGTTTCTAGTAAGCTTCAAAGGAAAAAGGATACGGTG                                                                                   |            |

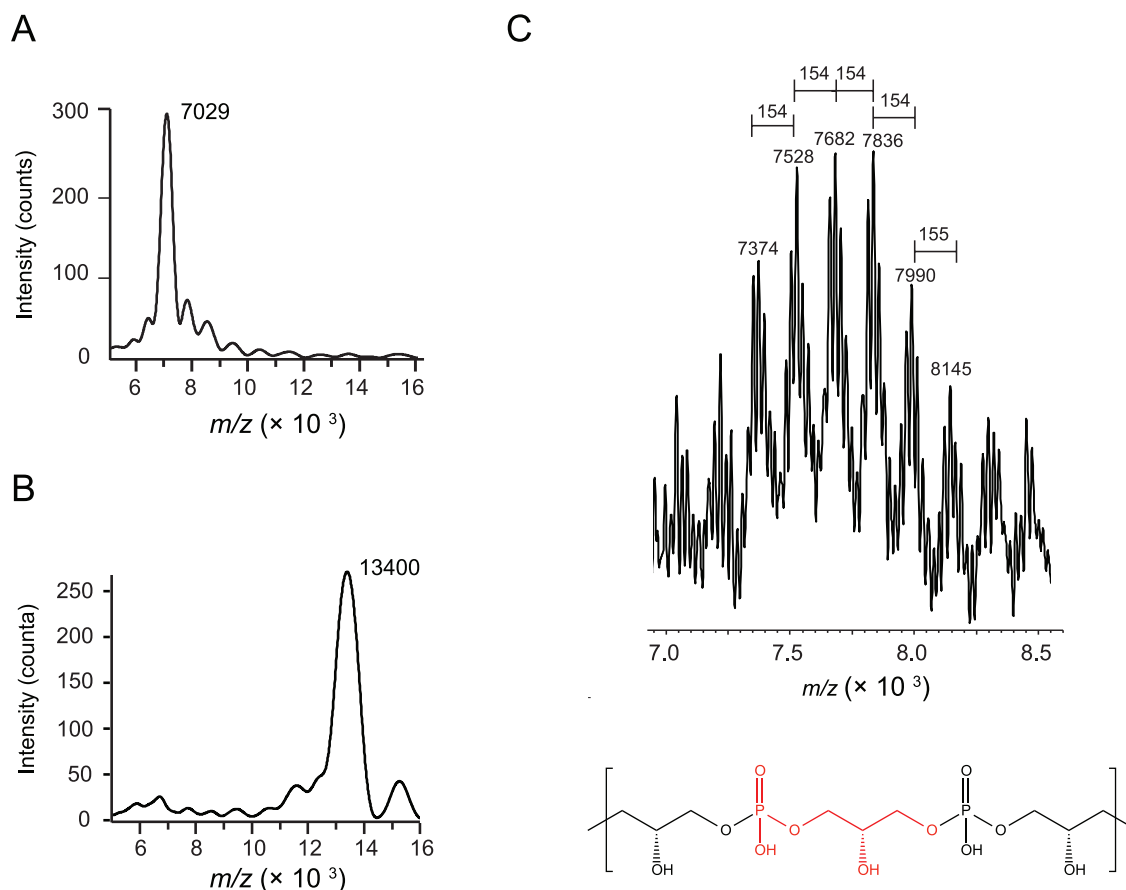

**Figure S1. MALDI-TOF mass spectrometry of WTA analogs.** Synthetic reactions for WTA analogs were performed as described in the main text. Samples were prepared for analysis by mixing a 5  $\mu$ L aliquot of the reaction mixture with an equal volume of a saturated matrix solution (2,5-dihydroxybenzoic acid in 50% acetonitrile and 0.1% trifluoroacetic acid). 1  $\mu$ L of this mixture was spotted onto a stainless steel MALDI plate and spectra were acquired in positive ion linear mode, using a Bruker UltrafleXtreme mass spectrometer, calibrated with external standards. Spectra are shown for *A*, the non-glycosylated analog,  $m/z$  7029:  $M + 4 Na^+$ ;  $M$  corresponds to the mass of a polymer containing 40 GroP units and *B*, the glycosylated analog,  $m/z$  13400 corresponds to addition of 39 glucose molecules to the non-glycosylated analog. *C*, MALDI-MS analysis of a larger scale (200  $\mu$ M) synthetic reaction for the lipid  $\phi.n$  ( $n = 43$ ) analog shows the products generated differ by the mass of the repeating glycerol phosphate polymer unit, colored red in the structure below the spectrum.

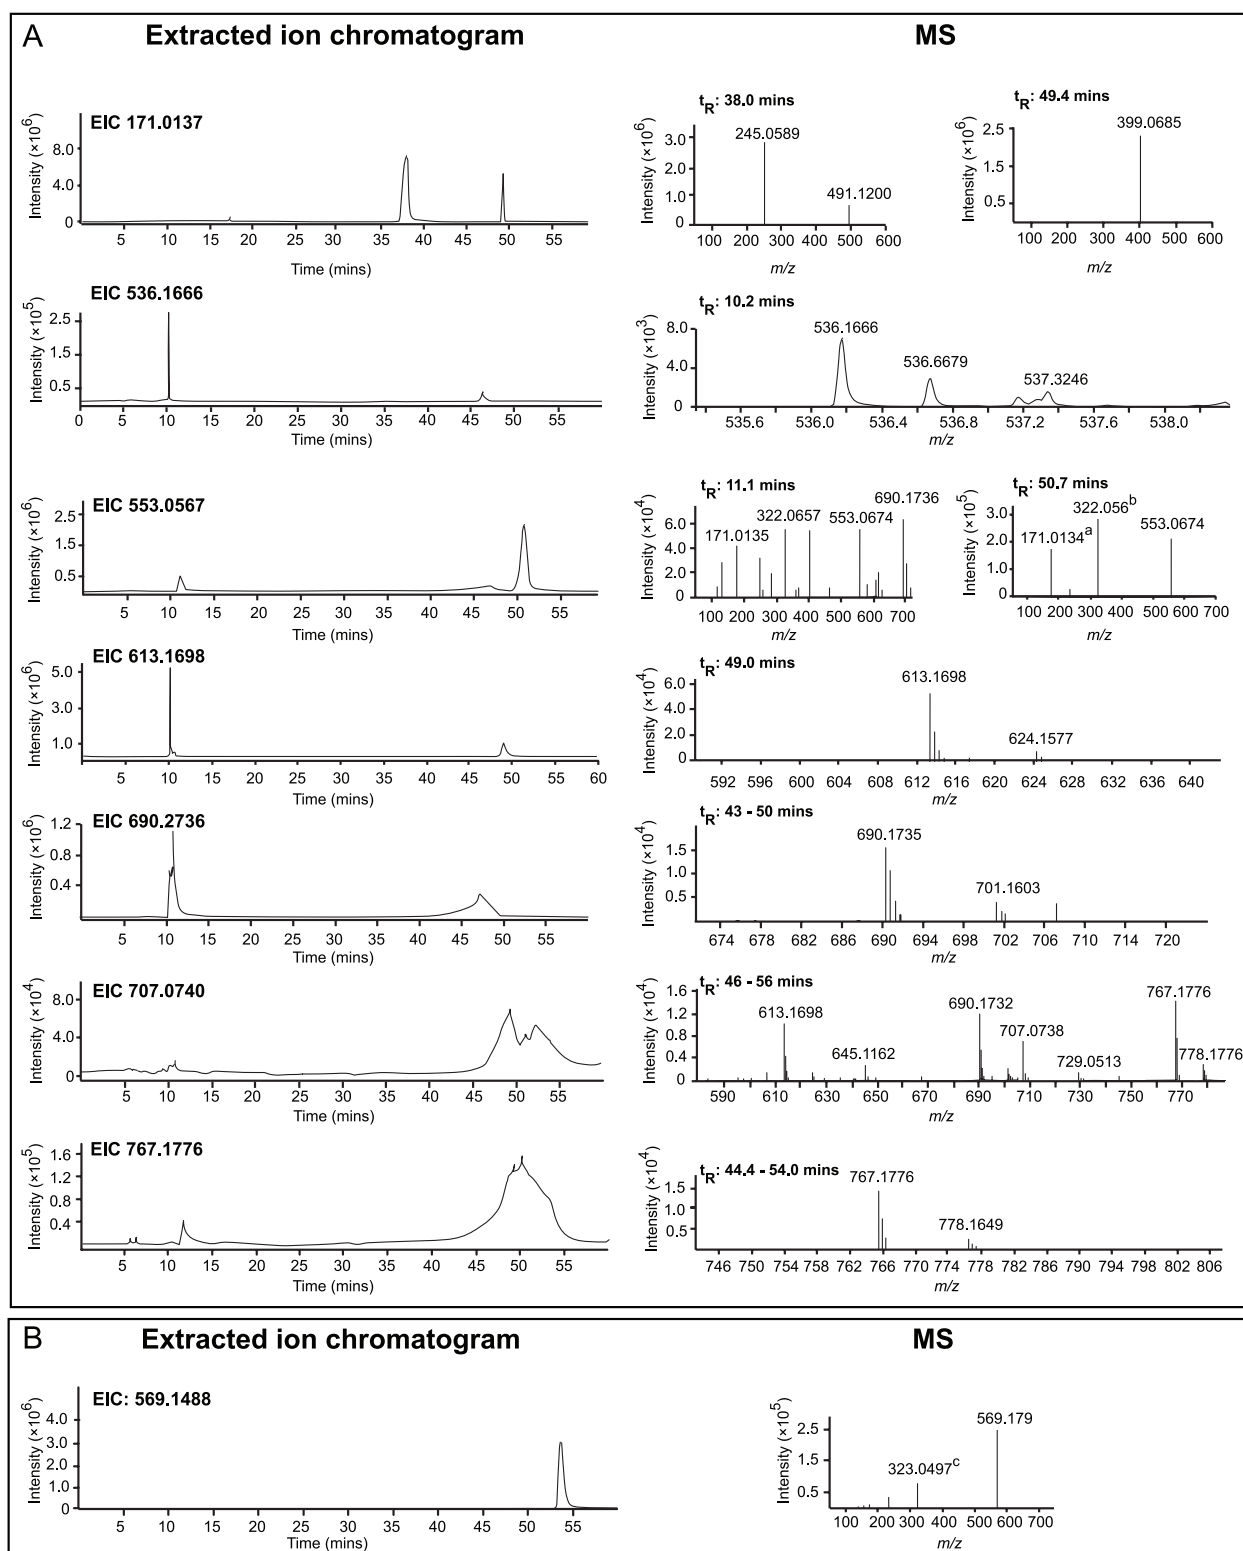

Supplement: supp_M115.662866_jbc.M115.662866-1.pdf [file supp_M115.662866_jbc.M115.662866-1.pdf]
